# Supplementary material for: Structural basis of damage recognition by thymine DNA glycosylase: Key roles for N-terminal residues
Source: PubMed Central journal article supplement — Nucleic Acids Res. 2016 Aug 31;44(21):10248–58. doi: 10.1093/nar/gkw768 (PMC5137436; doi:10.1093/nar/gkw768), 2016-08-31
Supplement: supp_gkw768_new_Supp_Info_TDG82-308_R1_2016-8-30.pdf [file supp_gkw768_new_Supp_Info_TDG82-308_R1_2016-8-30.pdf]

**Supplementary Data for:**  
**Structural basis of damage recognition by Thymine DNA Glycosylase**

Christopher T. Coey<sup>1,§</sup>, Shuja S. Malik<sup>1,§</sup>, Lakshmi S. Pidugu<sup>1</sup>, Kristen Varney<sup>1,2,3</sup>, Edwin  
Pozharski<sup>1,2,3,\*</sup>, and Alexander C. Drohat<sup>1,2,\*</sup>

<sup>1</sup>Department of Biochemistry and Molecular Biology, University of Maryland School of Medicine, Baltimore, MD 21201, USA, <sup>2</sup>University of Maryland Marlene and Stewart Greenebaum Cancer Center, Baltimore, MD 21201, USA, <sup>3</sup>Center for Biomolecular Therapeutics, Institute for Bioscience and Biotechnology Research, Rockville, MD 20850, USA

\* To whom correspondence should be addressed. Tel. 410-706-8118; Email:

[adrohat@som.umaryland.edu](mailto:adrohat@som.umaryland.edu). Tel: 240-314-6255; Email: [EPozharskiy@som.umaryland.edu](mailto:EPozharskiy@som.umaryland.edu)

**Supplementary Table S1. Data collection and refinement statistics**

|                                       | E·S TDG <sup>82-308</sup> G·U <sup>F</sup><br>(PDBID: 5HF7) | E·P TDG <sup>82-308</sup><br>(PDBID: 5FF8) | E·S TDG <sup>111-308</sup> G·U <sup>F</sup><br>(PDBID: 5JXY) |
|---------------------------------------|-------------------------------------------------------------|--------------------------------------------|--------------------------------------------------------------|
| <b>Data collection</b>                |                                                             |                                            |                                                              |
| Space Group                           | C2                                                          | C2                                         | C2                                                           |
| Cell Dimensions<br><i>a, b, c</i> (Å) | 97.0, 52.8, 81.2                                            | 96.9, 52.5, 81.3                           | 88.5, 53.3, 82.6                                             |
| $\beta$ (°)                           | 95.2                                                        | 95.2                                       | 95.6                                                         |
| Resolution (Å)                        | 32.52-1.54 (1.57-1.54)                                      | 31.08-1.70 (1.73-1.70)                     | 39.03-1.71 (1.74-1.71)                                       |
| $R_{\text{pim}}$                      | 0.035                                                       | 0.057                                      | 0.052                                                        |
| Mean $I/\sigma I$                     | 9.3 (0.6)                                                   | 7.9 (0.7)                                  | 12.9 (0.5)                                                   |
| CC <sub>1/2</sub>                     | 0.998 (0.35)                                                | 0.998 (0.50)                               | 0.999 (0.224)                                                |
| Completeness (%)                      | 100.0 (100.0)                                               | 100.0 (99.9)                               | 95.7 (37.0)                                                  |
| Redundancy                            | 5.0 (4.7)                                                   | 7.5 (7.4)                                  | 19.8 (7.3)                                                   |
| Wilson B-factor (Å <sup>2</sup> )     | 28.2                                                        | 29.0                                       | 24.6                                                         |
| <b>Refinement</b>                     |                                                             |                                            |                                                              |
| Program                               | BUSTER-TNT                                                  | BUSTER-TNT                                 | BUSTER-TNT                                                   |
| Resolution (Å)                        | 32.51-1.54                                                  | 32.48-1.70                                 | 24.97-1.71                                                   |
| No. of reflections                    | 59281                                                       | 44159                                      | 39815                                                        |
| $R_{\text{work}}/R_{\text{free}}$     | 0.186/0.216                                                 | 0.194/0.217                                | 0.197/0.231                                                  |
| Number of atoms                       |                                                             |                                            |                                                              |
| Protein                               | 1603                                                        | 1596                                       | 1544                                                         |
| DNA                                   | 1123                                                        | 1123                                       | 1164                                                         |
| Water                                 | 330                                                         | 235                                        | 228                                                          |
| B-factors (Å <sup>2</sup> )           |                                                             |                                            |                                                              |
| Protein                               | 36.8                                                        | 37.4                                       | 27.6                                                         |
| DNA                                   | 53.2                                                        | 55.3                                       | 43.8                                                         |
| Water                                 | 50.2                                                        | 43.3                                       | 40.6                                                         |
| Ramachandran Plot                     |                                                             |                                            |                                                              |
| Favoured (%)                          | 98.1                                                        | 97.5                                       | 96.4                                                         |
| Allowed (%)                           | 100                                                         | 100                                        | 100                                                          |
| Outliers (%)                          | 0                                                           | 0                                          | 0                                                            |
| RMSD from ideal                       |                                                             |                                            |                                                              |
| Bond lengths (Å)                      | 0.010                                                       | 0.010                                      | 0.008                                                        |
| Bond angles (°)                       | 1.0                                                         | 0.98                                       | 0.98                                                         |

Values shown in parenthesis are for highest resolution shell. The Ramachandran analysis was performed using Molprobability [1]. Wilson B-factor estimated by phenix.xtriage. Number of atoms includes all atom records explicitly included in the model, including alternate positions.

- Chen, V.B., W.B. Arendall, III, J.J. Headd, D.A. Keedy, R.M. Immormino, G.J. Kapral, L.W. Murray, J.S. Richardson, and D.C. Richardson, *MolProbability: all-atom structure validation for macromolecular crystallography*. Acta Crystallographica Section D, 2010. **66**(1): p. 12-21.

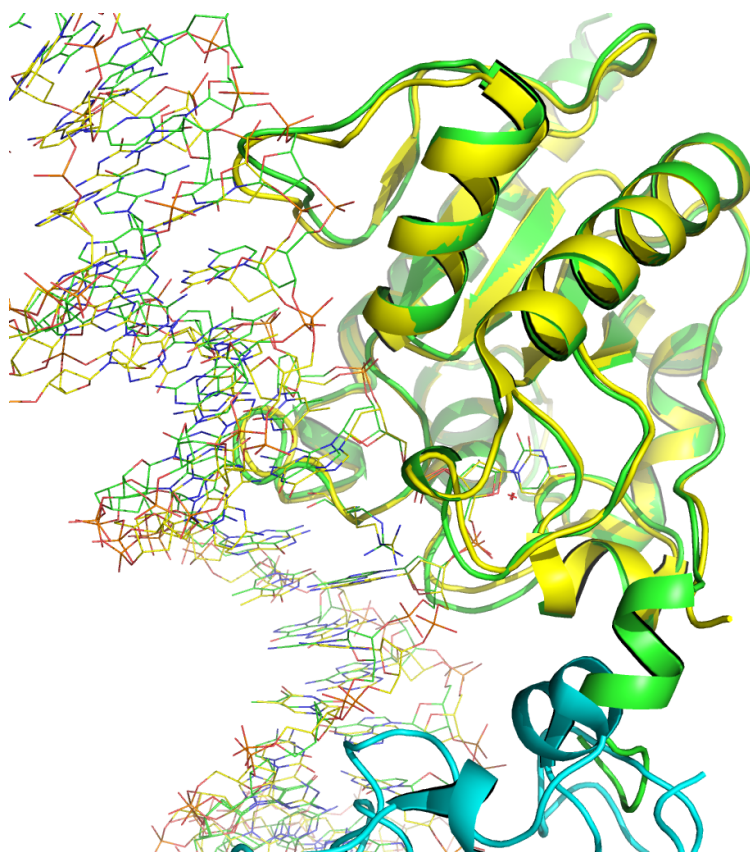

**Figure S1.** Alignments show that the previous TDG<sup>111-308</sup>-G·U<sup>F</sup> structure (2.97 Å, yellow) differs significantly from the new TDG<sup>111-308</sup>-G·U<sup>F</sup> structure (green), with a percentile-based spread (p.b.s.) of 0.51 Å (backbone; see main text). The previous TDG<sup>111-308</sup>-G·U<sup>F</sup> structure (PDBID: 3UFJ) was obtained from crystals in which TDG<sup>111-308</sup> binds DNA with 2:1 stoichiometry, one subunit (yellow) at the G·U<sup>F</sup> site and the other subunit (cyan) at a nonspecific site. The new TDG<sup>111-308</sup>-G·U<sup>F</sup> structure reported here features 1:1 stoichiometry. The N-terminal helix observed for structures with 1:1 binding (green helix with no yellow counterpart) is likely destabilized by the TDG:TDG dimer interface for complexes featuring 2:1 (TDG:DNA) binding.

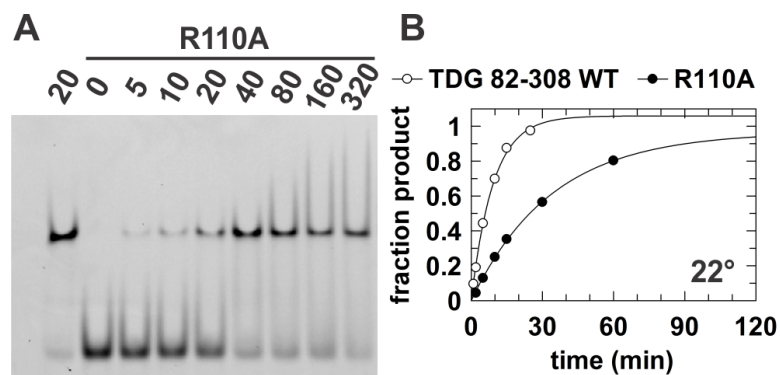

**Figure S2.** Biochemical studies of TDG<sup>82-308</sup> and its R110A variant. **(A)** Equilibrium binding of TDG<sup>82-308</sup> to DNA (10 nM) containing a G·T<sup>F</sup> mismatch, monitored by EMSA. For reference, the far left lane shows binding of native TDG<sup>82-308</sup> (20 nM) to G·T<sup>F</sup> DNA. **(B)** Single-turnover kinetics for excision of T from a G·T DNA substrate by wild-type TDG<sup>82-308</sup> and the R110A mutant at 22 °C (R110A-TDG<sup>82-308</sup> is unstable at 37 °C). The rate constants are  $k_{\max} = 0.108 \pm 0.006 \text{ min}^{-1}$  for TDG<sup>82-308</sup> and  $k_{\max} = 0.030 \pm 0.001 \text{ min}^{-1}$  for R110A-TDG<sup>82-308</sup>, giving a 3.7-fold mutational affect.

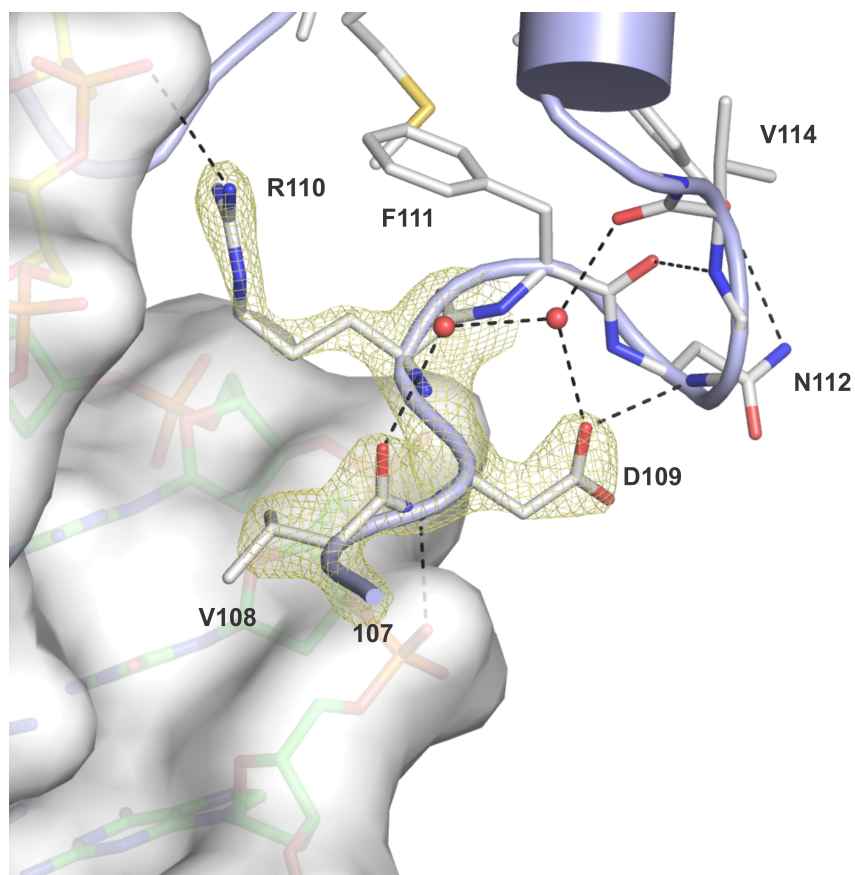

**Figure S3.** Crystal structure of an E·S complex for TDG<sup>82-308</sup> bound to G·U<sup>F</sup> DNA (PDBID: 5HF7), solved at 1.54 Å resolution, focusing on N-terminal residues. TDG is in cartoon format (blue) with some residues in stick format (C, white; N, blue; O, red). The  $2F_o - F_c$  electron density map, contoured at  $1.0 \sigma$ , is shown in yellow for residues 107 to 110 of TDG. DNA is shown in space and stick formats, with the dUrd-containing strand yellow and the complementary strand green. Water molecules are shown as red spheres and dashed lines represent hydrogen bonds.

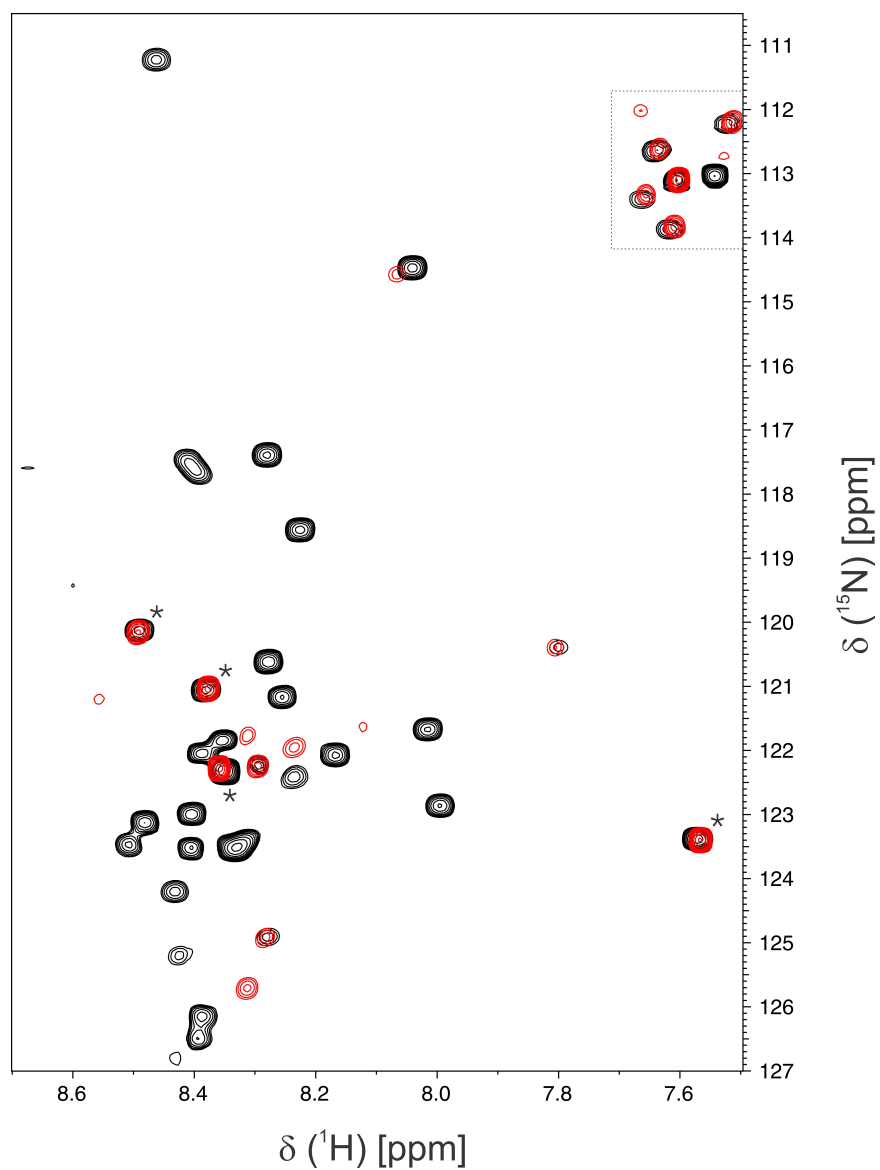

**Figure S4.**  $^{15}\text{N}$ -HSQC NMR spectra for TDG<sup>82-308</sup> (black peaks) and TDG<sup>111-308</sup> (red). Four resonances that are nearly identical in both spectra (marked with \*) likely represent disordered C-terminal residues (see main text). Resonances in the upper right (box with dotted lines) are from side chain amino groups. The NMR samples contained TDG<sup>82-308</sup> or TDG<sup>111-308</sup> in 0.02 M sodium phosphate pH 6.5, 0.15 M NaCl, 0.2 mM EDTA, 0.2 mM DTT, 7% D<sub>2</sub>O. Experiments were collected at 18 °C on an 800 MHz NMR spectrometer.

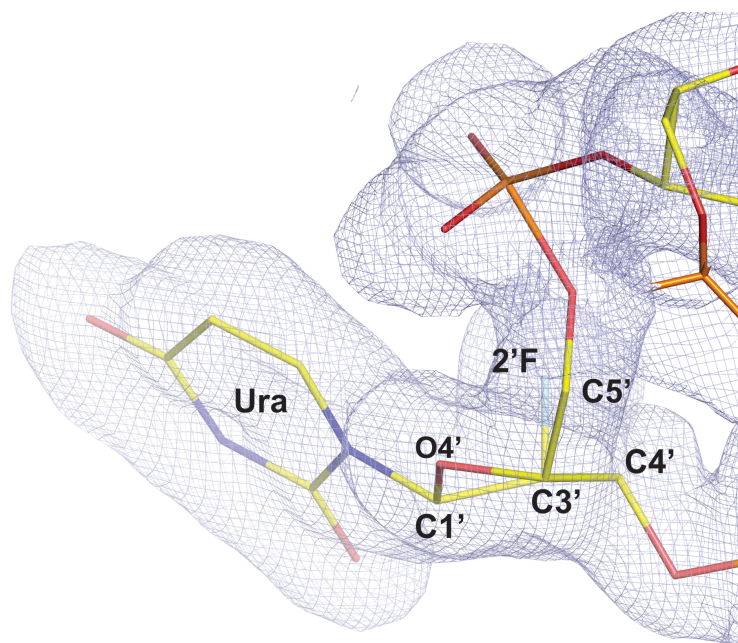

**Figure S5.** The 2'-fluoroarabino-dUrd analog flipped into the TDG<sup>82-308</sup> active site exhibits a C1'-exo-O4'-endo sugar pucker. The DNA is shown in stick format colored yellow (cyan for 2'-F), with a  $2F_o-F_c$  map contoured at  $1.0 \sigma$ . Note that the sugar is oriented such that C2' and C3' are aligned, with the bond vector pointing toward the viewer and C3' in the foreground.

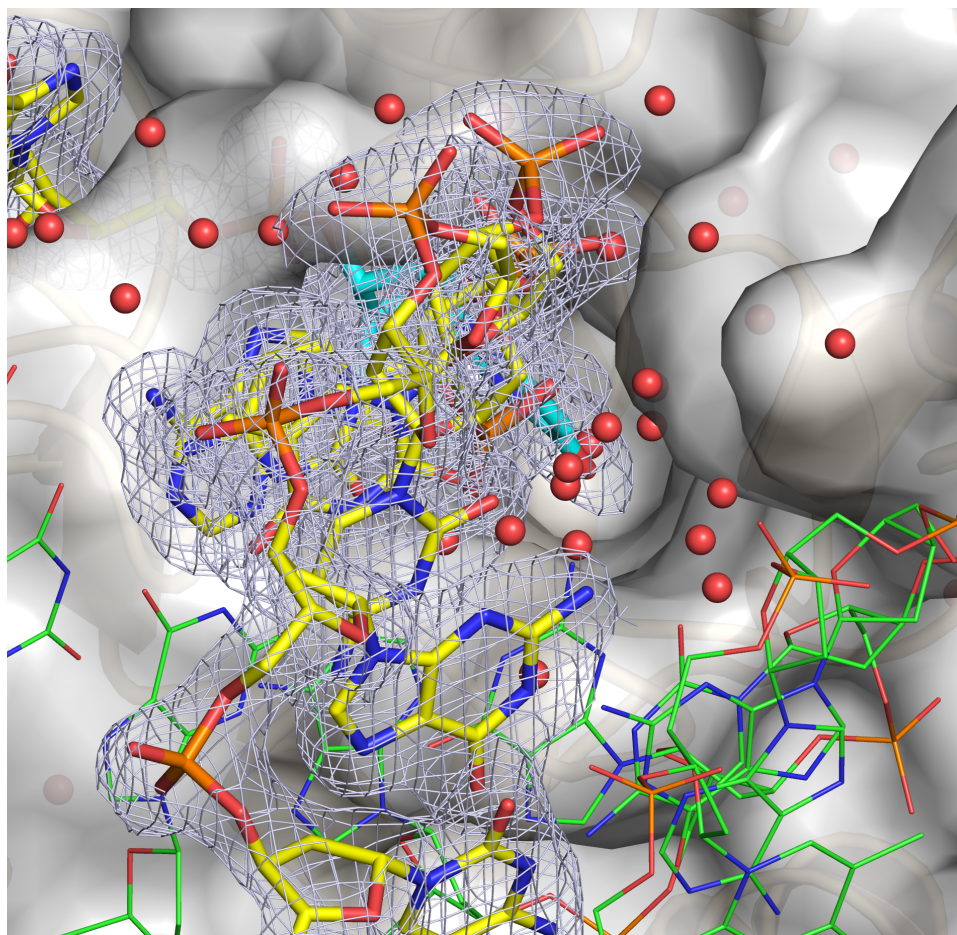

**Figure S6.** Structure of an E·S complex for TDG<sup>82-308</sup> bound to G·U<sup>F</sup> features a solvent-filled channel from the active site to the enzyme surface, along the target DNA strand. TDG<sup>82-308</sup> is shown in space-filling and cartoon modes, the DNA is in stick format, with the target strand in yellow, the dUrd nucleotide cyan, and the complementary DNA strand in green. The  $2F_o-F_c$  map, contoured at  $1.0 \sigma$ , is shown in blue for the target DNA strand. Water molecules are shown as red spheres.



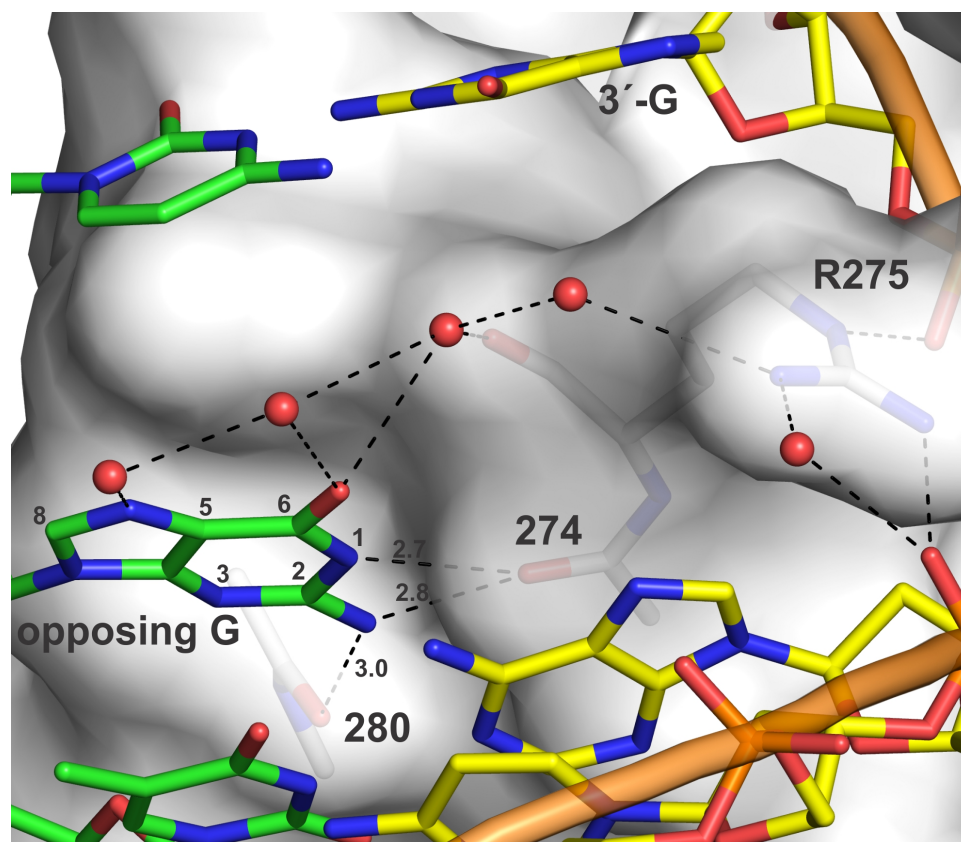

**Figure S7.** TDG contacts the Gua (“opposing G”) of the G·U mispair. TDG<sup>82-308</sup> is shown in surface representation with residues that contact the opposing G shown as sticks. The Ura-containing DNA strand is yellow and the complementary strand green, and water molecules are red spheres. Dashed lines represent hydrogen bonds, with interatomic distances (Å). The backbone oxygen of Ala<sup>274</sup> contacts the opposing Gua at both N1H (2.7 Å) and N2H<sub>2</sub> (2.8 Å), and the Gua is also contacted at N2H<sub>2</sub> by the backbone oxygen of Pro<sup>280</sup> (3.0 Å).
